# Supplementary material
Source: HighWire-hosted journal article supplement (https://tsaco.smart01.highwire.org/content/3/1/e000145)
Supplement: inline-supplementary-material-1 [file inline-supplementary-material-1.docx]

Table 1. Common and Unique Data Elements Contained in Trauma Flow Sheets by Category

**Common Variables**

| **Prehospital (PH) & Team Response (1,2)** | **Medical History & Patient Assessment (3,4)** | **Procedural**  **Interventions, Diagnostics (5,6)** | **Fluids Blood Drugs**  **(7)** | **Narrative and Vital Signs**  **(8)** | **Disposition**  **(9)** |
| --- | --- | --- | --- | --- | --- |
| Activation level  Upgrade/downgrade  Activation time  Transport mode  Agency  Team response and times  Mechanism of Injury  Safety devices  Cervical collar  Immobilization  Oxygen  PH arrest  LOC documented  Field vital signs  IV sites  Fluid infused – type  Fluid infused –amount  Medications  EtOH evident | Arrival vitals  Primary survey  Adult GCS  Pediatric GCS  Secondary Assessment  History  Allergies  Medications  Past Illness  Pregnancy  Last meal  Events  Height and weight  Injury diagram  Broselow Color | Airway  Needle decompression  Chest tube  FAST  Pericardiocentesis  Thoracotomy  Cross clamp time  Arterial line  IV access  Central access  Foley  Gastric tube  Peritoneal Lavage  Splints  REBOA  Cervical collar  CPR  Tourniquet  Spine board  Traction  **Films:** Cspine, Chest, Pelvis  **CT:** Head, Spine, Chest, Pelvis Cystogram, IVP | Crystalloids  Packed cells  Plasma  Platelets  Cryoprecipitate  Medications  Amount infused  Dose  Route  Time | Time  Temperature  Blood pressure  Pulse  Respirations  End-tidal CO2  O2 saturations  Pupil size (R/L)  GCS (EVM)  Pain 0-10  Sedation 1-7  Written narrative | Admit  Room number  Location  AMA  Transferred  Time out of ED  Report given  Died  Time  Coroner information  Organ donor services called  Valuables |

**Unique Variables**

| **Prehospital (PH) & Team Response**  **(Military)**  **(1,2)** | **Medical History & Patient Assessment**  **(Civilian)**  **(3,4)** | **Interventions & Diagnostics**  **(Military)**  **(5,6)** | **Fluids Blood Drugs**  **(7)** | **Narrative and Vital Signs**  **(8)** | **Disposition (Civilian/Military)**  **(9)** |
| --- | --- | --- | --- | --- | --- |
| Evacuation site  Triage category  Armed services branch  PH warming devices | Developmental delays  Pediatric feeding method  Social history  Infectious disease exposure  Advanced Directives  Learning needs  Chronic pain history | Eye shield  Hemorrhage control measures  Wound Care  Level I use  Ventilator settings |  |  | Hold – police, mental health  RTD  Evacuation to  Host Nation  Coalition  CASF  Evacuation mode |

PH Prehospital, LOC Loss of consciousness, IV intravenous, EtOH alcohol, GCS Glasgow Coma Score, CT Chest tube, FAST focused abdominal sonogram for trauma, REBOA resuscitative endovascular balloon of the aorta, CPR cardiopulmonary resuscitation, EVM eyes, verbal, motor, AMA against medical advice, ED emergency department, RTD return to duty
